# Supplementary material for: Correlation of Adventitial Vasa Vasorum with Intracranial Atherosclerosis: A Postmortem Study
Source: PubMed Central journal article supplement — J Stroke. 2018 Sep 30;20(3):342–9. doi: 10.5853/jos.2018.01263 (PMC6186920; doi:10.5853/jos.2018.01263), 2018-09-30
Supplement: jos-2018-01263-suppl.pdf [file jos-2018-01263-suppl.pdf]

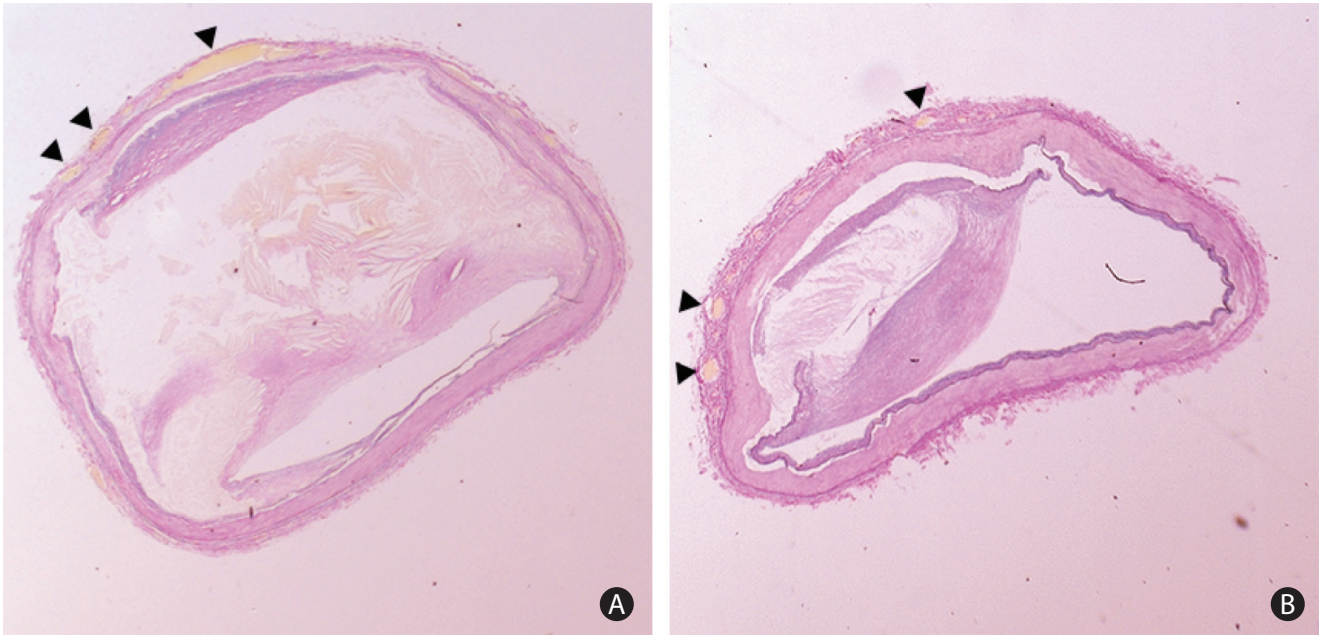

**Supplementary Figure 1.** (A, B) Vasa vasorum (triangles) of intracranial vertebral artery. These were cross-sections of two vertebral arteries showing vasa vasorum in close anatomic relation with atherosclerotic plaques (H&E stain,  $\times 1.6$ ).
